# Supplementary material for: Human Alveolar Type II Organoids from Fibrotic Lungs Capture Disease-Specific Metabolic Reprogramming and Provide a Platform for Personalized Medicine
Source: Research Square preprint supplement (doi:10.21203/rs.3.rs-7913465/v1), 2025-11-04
Supplement: Supplementary file 2 [file 98cd3bef80d582d35079fada.xlsx]

## Sheet: patient cohort
EXPLANTS
No.	ID	SEX	AGE	DIAGNOSIS	UTILIZATION
1	GLE1082	m	60	IPF	B
2	GLE1102	m	66	IPF	B
3	GLE1121	m	60	IPF	B
4	GLE1094	m	60	IPF	B, D
5	GLE1126	m	68	IPF	C1, H
6	GLE1129	m	56	IPF	C1, F, H
7	GLE1151	m	61	IPF	E, F, K
8	GLE1152	m	45	IPF	E, K
9	GLE1163	m	59	IPF	K
10	GLE1190	m	66	IPF	E, K
11	GLE1207	m	62	IPF	C1, G
12	GLE1214	m	63	IPF	C2, H
13	GLE1222	w	63	IPF (+EAA)	K, H
14	GLE1233	m	65	IPF	H
15	GLE1238	m	58	IPF	B
16	GLE1085	m	48	sec. Fibrosis (EAA)	C1
17	GLE1090	m	67	sec. Fibrosis (EAA)	C1
18	GLE1101	m	54	sec. Fibrosis (ReTx)	B, D, F, G
19	GLE1108	w	67	sec. Fibrosis (RA rheumatic arthritis)	C2
20	GLE1127	w	59	sec. Fibrosis (RA rheumatic arthritis)	I, J
21	GLE1131	w	66	sec. Fibrosis (EAA)	E
22	GLE1132	w	61	sec. Fibrosis (EAA)	C1
23	GLE1134	m	57	sec. Fibrosis (EAA)	B, F, G, K
24	GLE1137	w	23	sec. Fibrosis (COPA)	A, B, F, G, I, J
25	GLE1147	m	32	sec. Fibrosis (EAA)	A, B, D, E, J F, G
26	GLE1155	m	33	sec. Fibrosis (Lupus erythematodes)	B, D, E, G, J, I, K
27	GLE1167	m	60	sec. Fibrosis (systemic)	B, I, J, K
28	GLE1168	m	58	sec. Fibrosis (Sjögren-Syndrom/COPD)	E
29	GLE1179	w	53	sec. Fibrosis (RA rheumatic arthritis)	E
30	GLE1180	w	55	sec. Fibrosis (Influenza-A associated)	C2
31	GLE1187	m	66	sec. Fibrosis (Lupus erythematodes)	A, B
32	GLE1191	m	64	sec. Fibrosis (RA rheumatic arthritis)	B
33	GLE1194	m	69	sec. Fibrosis (UIP)	B, F
34	GLE1196	m	63	sec. Fibrosis (UIP/ RA rheumatic arthritis)	B
35	GLE1197	m	44	sec. Fibrosis (Sars-CoV-2 associated)	B
36	GLE1206	m	65	sec. Fibrosis (EAA)	B
37	GLE1211	m	65	sec. Fibrosis (unclear)	C2
38	GLE1219	w	64	sec. Fibrosis (EAA)	K
39	GLE1220	m	48	sec. Fibrosis (CPFE)	K
40	GLE1221	m	64	sec. Fibrosis (amy. Dermatomyositis)	K
41	GLE1223	m	61	sec. Fibrosis (NSIP/ Psoriasis)	B
TUMOR-DISTANT CONTROL TISSUE
No.	ID	SEX	AGE	DIAGNOSIS	UTILIZATION
1	GLR 982	m	75	NSCLC	B
2	GLR 984	m	58	Metastasing Rectum Carcinom, Lung Carcinom	B
3	GLR1050	w	67	NSCLC	B, F
4	GLR1052	w	69	NSCLC	C1
5	GLR1111	m	67	NSCLC	B, C1, D, F, G, H, K
6	GLR1156	w	57	NSCLS	C1, D, I, J,H
7	GLR1168	w	67	Unclear circular lesion, COPD	B, C1, H, I, J, K
8	GLR1170	m	87	NSCLC	B, C1, H, J, K
9	GLR1172	m	72	NSCLC	B, C1, I, J
10	GLR1173	w	62	Adenocarcinoma	B, C2, F, G
11	GLR1185	w	25	Pleurodesis	A, B, E, I, J
12	GLR1193	w	73	Complete lobectomy	A, B, E
13	GLR1198	w	56	NSCLC/ Adenocarcinoma	A, B, E, K
14	GLR1203	w	68	NSCLC, Mamma-Carcinom, COPD	E, K
15	GLR1238	w	59	Adenocarcinoma, Mamma-Carcinom	C2
16	GLR1244	m	66	NSCLC, Mamma-Carcinom	I, J
17	GLR1246	m	69	Unclear; Rectal Cancer	G
18	GLR1260	w	36	Neuroendocrine tumor	B, K
19	GLR1261	w	77	Squamous cell carcinoma/COPD, following chemotherapy	K
20	GLR1289	m	70	Squamous cell carcinoma	G
21	GLR1290	w	57	Mamma-Carcinoma, following chemotherapy	E
Assay Code					Average age per disease	age	SD		Total number of cases	m	f
A	Cytospin				IPF	60.8	5.29402		IPF	14	1
B	Brightfield/Colony Formation Rate				EAA	51.7143	13.3925		EAA	5	3
C1	Flow cytometry- organoids(HT-II-280, proSP-C, HT-I-56, Lysotracker, Annexin V)				UIP	66.5	2.5		UIP	2	0
C2	Flow cytometry- organoids(HT-II-280, proSP-C, HT-I-56, Lysotracker, Annexin V)				RA	62.8	5.77581		RA	2	3
D	Imaging/TEM				Viral	58	5		Viral	1	1
E	H&E				Lupus	43.5	11.5		Lupus	2	0
F	IF- whole mount				Others	57.25	11.0767		Others	6	1
G	IF- cross-sections				Total	58	10.0923		Total	32	9
H	Live Dye IF(Lysotracker)
I	Live Dead IF
J	LDH & WST				Average age control group	age	SD		Total number control group	m	f
K	Extracellular Flux				N (tumor-distant control)	63.6667	13.1415		N	8	13
					Total study
					Numer of cases	61
					Male	40
					Female	22
					Age	59.9194	11.5344
